# Supplementary material for: Diaminopyrene modified reduced graphene oxide as a novel electrode material for excellent performance supercapacitors
Source: Royal Society of Chemistry journal article supplement (doi:10.1039/c9ra10429a), 2020-01-01
Supplement: c9ra10429a1.pdf [file c9ra10429a1.pdf]

**Diaminopyrene modified reduced graphene oxide as novel  
electrode material for excellent performance  
supercapacitors**

Hongwei Kang<sup>a\*</sup>, Chengpeng Zhang<sup>b</sup>, Yonggui Xu<sup>b</sup>, Weiyang Zhang<sup>a</sup>, Jianhua Jiao<sup>b</sup>,

Zhikun Li<sup>a\*</sup>, LeiLei Zhu<sup>b</sup>, and Xiaoqian Liu<sup>b</sup>

<sup>a</sup>Henan Key Laboratory of Nanocomposite and Application, Institute of Nanostructured Functional Materials, Huanghe Science and Technology College, Zhengzhou 450006, China.

<sup>b</sup>Henan Science and Technology Exchange Center with Foreign Countries.

\*Corresponding Authors.

E-mail: hongweikang@infm.hhstu.edu.cn, zhikunli@infm.hhstu.edu.cn

## Supplementary Figures

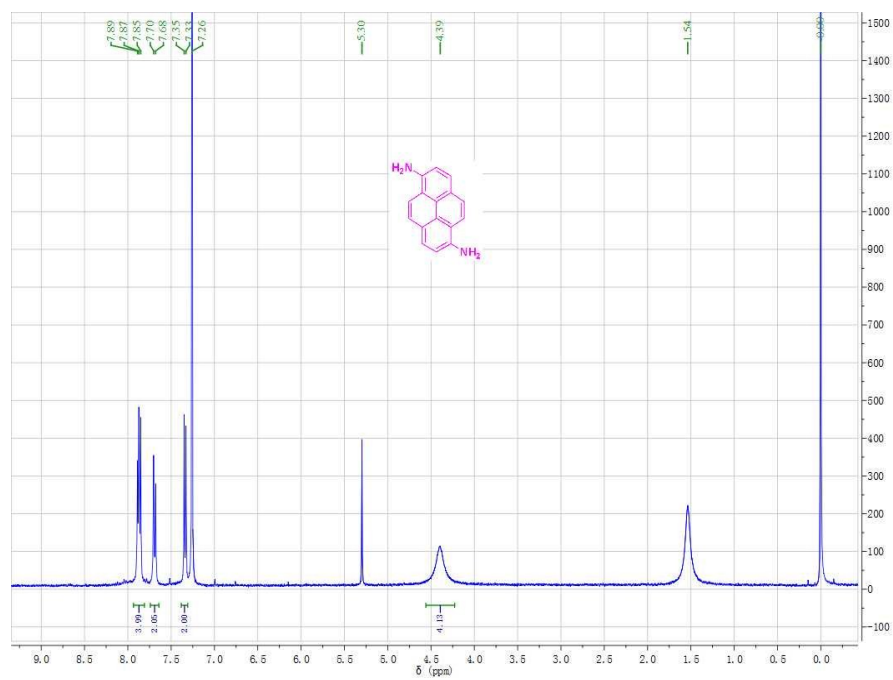

**Fig. S1** NMR spectra of the prepared DAP materials.

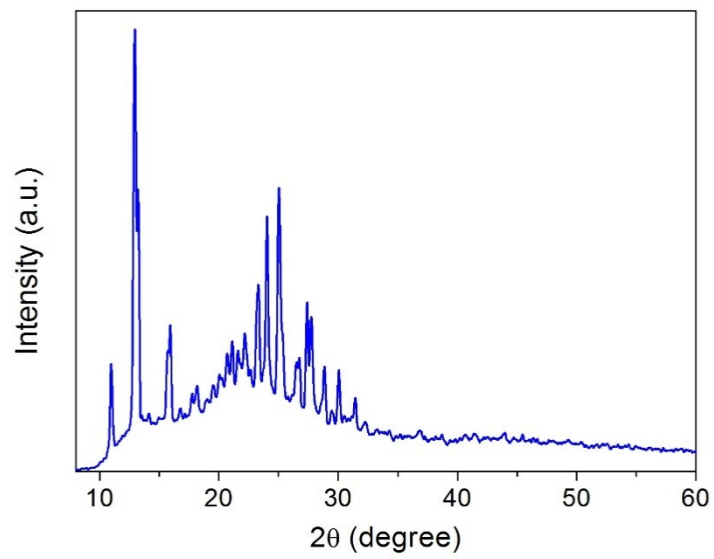

**Fig. S2** XRD pattern of DAP sample.

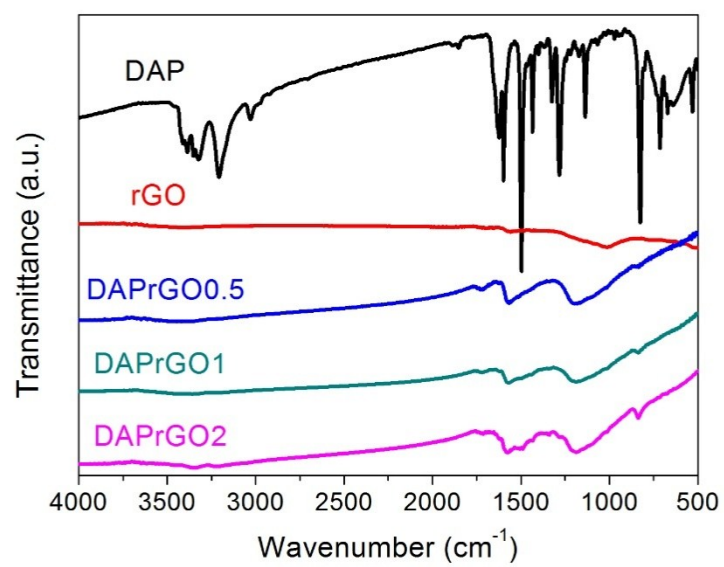

**Fig. S3** The comparison of FTIR spectra of DAP, rGO, DAPrGO0.5, DAPrGO1, and DAPrGO2 samples.

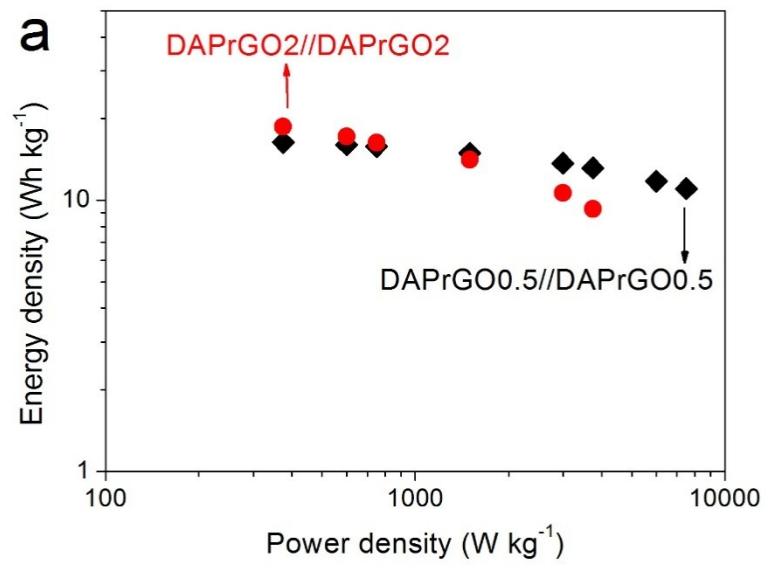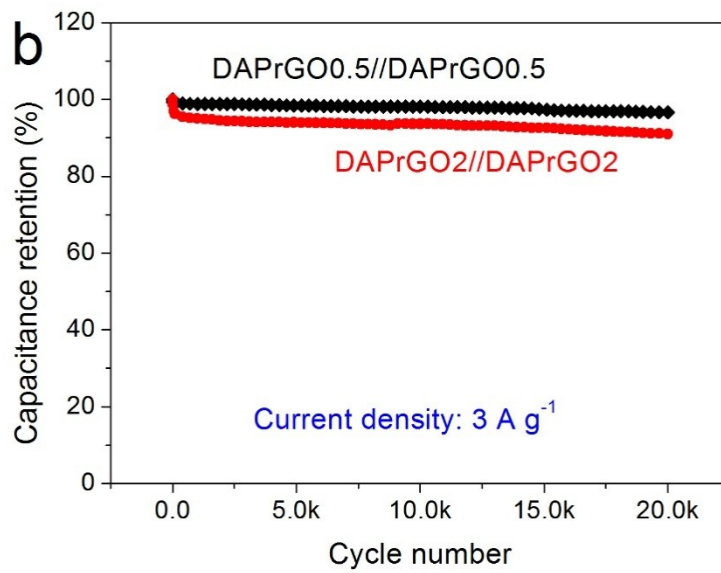

**Fig. S4** (a) Ragone plot and (b) Cyclic stability of DAPrGO0.5//DAPrGO0.5 SSS and DAPrGO2//DAPrGO2 SSS.

**Table S1** Textural parameters of the GO, rGO and DAPrGOs samples

| Sample    | $S_{\text{BET}}$ ( $\text{m}^2 \text{g}^{-1}$ ) | $D_{\text{DFT}}$ (nm) | $V$ ( $\text{cm}^3 \text{g}^{-1}$ ) |
|-----------|-------------------------------------------------|-----------------------|-------------------------------------|
| GO        | 5.80                                            | 2.199                 | 0.002                               |
| rGO       | 122.96                                          | 14.592                | 0.531                               |
| DAPrGO0.5 | 26.56                                           | 40.321                | 0.084                               |
| DAPrGO1   | 38.83                                           | 13.963                | 0.129                               |
| DAPrGO2   | 32.17                                           | 12.730                | 0.126                               |

**Note:**  $S_{\text{BET}}$  is the BET surface area;  $D_{\text{DFT}}$  is the DFT desorption average pore diameter;  $V$  is the total pore volume.

**Table S2** Comparison of electrochemical performances for the similar conductive organic-based electrode materials in the previous literatures.

| Samples                      | $S_c$<br>( $F g^{-1}$ ) | Current density<br>(Scan rate) | E<br>( $W h kg^{-1}$ )<br>P<br>( $W kg^{-1}$ )      | capacitance retention<br>(cycle numbers) | Ref.      |
|------------------------------|-------------------------|--------------------------------|-----------------------------------------------------|------------------------------------------|-----------|
| AQS@rGO                      | 567.1                   | $1 A g^{-1}$                   | 29.2;<br>3420                                       | 83.1%<br>10,000                          | 1         |
| quinone-coated carbon onions | 264                     | $1.3 A g^{-1}$                 | 4.5                                                 | 97%<br>10,000                            | 2         |
| PPy-RGO                      | 255.7                   | $0.2 A g^{-1}$                 | 7.02;<br>89                                         | 93%<br>1,000                             | 3         |
| Ap-rGO                       | 160                     | $5 mV s^{-1}$                  | 5.6;<br>$\sim 50$                                   | 85%<br>(5,000)                           | 4         |
| RGO/BPA                      | 466                     | $1 A g^{-1}$                   | /;<br>/                                             | 90%<br>(4,000)                           | 5         |
| PYT-NH <sub>2</sub> /rGO     | 326.6                   | $0.5 A g^{-1}$                 | 15.4;<br>300.3                                      | $\sim 100\%$<br>(25,000)                 | 6         |
| RGO/UCNTs/PAN<br>I           | 359.3                   | $1 A g^{-1}$                   | 7.4;<br>189.0                                       | 80.5%<br>(2,000)                         | 7         |
| AQSGH                        | 258                     | $0.3 A g^{-1}$                 | /;<br>/                                             | $>100\%$<br>(2,000)                      | 8         |
| PPD modifie rGO              | 316.54                  | $10 mV s^{-1}$                 | 27.01;<br>926.06                                    | 93.66%<br>(4000)                         | 9         |
| PF-PAM-RGO                   | 214.8                   | $0.2 mA cm^{-2}$               | $80.59 \mu Wh cm^{-2}$ ;<br>$2549.83 \mu W cm^{-2}$ | 92.36%<br>8000                           | 10        |
| DAPrGO1                      | 397.63                  | $0.5 A g^{-1}$                 | 25.84 (375);<br>18.71 (7500)                        | 94.57%<br>(20,000)                       | This work |

**Notes and references**

- 1 R. Y. Shi, C. P. Han, H. Duan, L. Xu, D. Zhou, H. F. Li, J. Q. Li, F. Y. Kang, B. H. Li and G. X. Wang, *Adv. Energy Mater.*, 2018, **8**, 1802088.
- 2 D. M. Anjos, J. K. McDonough, E. Perre, G. M. Brown, S. H. Overbury, Y. Gogotsi and V. Presser, *Nano Energy*, 2013, **2**, 702-712.
- 3 J. B. Zhu, Y. L. Xu, J. Wang, J. P. Wang, Y. Bai and X. F. Du, *Phys. Chem. Chem. Phys.*, 2015, **17**, 19885-19894.
- 4 E. Y. L. Teo, N. L. Hong, R. Jose and K. F. Chong, *Rsc Adv.*, 2015, **5**, 38111-38116.
- 5 H. X. Hu, Z. A. Hu, X. Y. Ren, Y. Y. Yang, R. B. Qiang, N. An and H. Y. Wu, *Chinese J. Chem.*, 2015, **33**, 199-206.
- 6 J. Q. Shi, Z. P. Zhao, J. C. Wu, Y. B. Yu, Z. K. Peng, B. J. Li, Y. S. Liu, H. W. Kang and Z. Y. Liu, *ACS Sustain. Chem. Eng.*, 2018, **6**, 4729-4738.
- 7 Y. P. Huang, J. J. Zhou, N. Gao, Z. X. Yin, H. H. Zhou, X. Y. Yang and Y. F. Kuang, *Electrochim. Acta*, 2018, **269**, 649-656.
- 8 Q. Wu, Y. Y. Sun, H. Bai and G. Q. Shi, *Phys. Chem. Chem. Phys.*, 2011, **13**, 11193-11198.
- 9 X. N. Lu, L. Y. Li, B. Song, K. S. Moon, N. N. Hu, G. L. Liao, T. L. Shi and C. P. Wong, *Nano Energy*, 2015, **17**, 160-170.
- 10 M. Y. Jia, L. L. Cui, F. Peng, Y. Li, L. S. Xu and X. J. Jin, *New J Chem.*, 2019, **43**, 6394-6403.
